1 **Alcohol consumption and heavy episodic drinking within different types of drinking occasion in**  
2 **Great Britain: An event-level latent class analysis.**

3 *John Holmes*<sup>1\*</sup>, *Alessandro Sasso*<sup>1,2</sup>, *Mónica Hernández Alava*<sup>1</sup>, *Rita Borges Neves*<sup>3</sup>, *Abigail K Stevely*<sup>1</sup>,  
4 *Alan Warde*<sup>4</sup>, *Petra S Meier*<sup>1,5\*</sup>

5 \* Joint lead authors.

6 <sup>1</sup> School of Health and Related Research, University of Sheffield, Sheffield, UK.

7 <sup>2</sup> European Commission, Joint Research Center (JRC), Ispra, Italy.

8 <sup>3</sup> Management School, University of Sheffield, Sheffield, UK.

9 <sup>4</sup> School of Social Sciences, University of Manchester, Manchester UK.

10 <sup>5</sup> MRC/CSO Social and Public Health Sciences Unit, University of Glasgow, Glasgow, UK.

11

12

13

14 **Word count:** 3,946

15 **Running title:** Typology of British drinking occasions

16 **Primary funding:** This work was supported by Economic and Social Research Council Grant Number  
17 ES/R005257/1. PM's research is also supported by UK Medical Research Council and Chief Scientist  
18 Office grants MC\_UU\_00022/5 and SPHSU20. For the purpose of open access, the author has applied  
19 a Creative Commons Attribution (CC BY) licence\* to any Author Accepted Manuscript version arising

20 **Declarations of competing interest:** The data provider, Kantar, played no role in the research  
21 process, including conception, design, analysis, interpretation, write-up or the decision to publish.  
22 Use of the data is allowed under the terms of a contract and nondisclosure agreement between  
23 Kantar and the Universities of Sheffield and Glasgow which requires research outputs to be  
24 submitted to the data provider ahead of publication. The data providers' right to request changes is  
25 limited to matters of accuracy regarding their data. No change requests were made in relation to  
26 this article. Data is not publicly shareable but there is agreement that data, analyses and results can  
27 be checked by competent independent reviewers as part of a confidential review process.

28 **ABSTRACT**

29 **Aims:** To update a previous typology of British alcohol drinking occasions using a more recent and  
30 expanded dataset and revised modelling procedure. To estimate the average consumption level,  
31 prevalence of heavy drinking, and distribution of total alcohol consumption and heavy drinking within  
32 and across occasion types.

33 **Design:** Cross-sectional latent class analysis of event-level diary data.

34 **Setting:** Great Britain, 2019.

35 **Cases:** 43,089 drinking occasions reported by 17,821 adult drinkers.

36 **Measurements:** The latent class indicators are characteristics of off-trade only (e.g. home), on-trade  
37 only (e.g. bar) and mixed trade (e.g. home and bar) drinking occasions. These describe companions,  
38 venue(s) and location, purpose, motivation, accompanying activities, timings, weekday, consumption  
39 volume in units (1 UK unit = 8g ethanol) and predominant beverage consumed.

40 **Findings:** Three latent class models identified four off-trade only occasion types (i.e. latent classes),  
41 eight on-trade only occasion types and three mixed-trade occasion types. Mean consumption per  
42 occasion varied between 4.4 units in *Family meals* to 17.7 units in *Big nights out with pre-loading*.  
43 Mean consumption exceeded ten units in all mixed-trade occasion types and in *Off-trade get*  
44 *togethers*, *Big nights out* and *Male friends at the pub*. Three off-trade occasion types accounted for  
45 50.8% of all alcohol consumed and 51.8% of heavy drinking occasions: *Quiet drink at home alone*,  
46 *Evening at home with partner* and *Off-trade get togethers*. For thirteen out of fifteen occasion types,  
47 more than 25% of occasions involved heavy drinking. Conversely, 41.7% of *Big nights out* and 16.4%  
48 of *Big nights out with preloading* were not heavy drinking occasions.

49 **Conclusions:** Alcohol consumption varies substantially across and within fifteen types of drinking  
50 occasion in Great Britain. Heavy drinking is common in most occasion types. However, moderate  
51 drinking is also common in types often characterised as heavy drinking practices. Mixed-trade drinking  
52 occasions are particularly likely to involve heavy drinking.

53

## 54 INTRODUCTION

55 Epidemiological research increasingly examines alcohol consumption at the occasion- or event-level  
56 [1]. This work draws on diverse disciplinary and methodological traditions to address topics including  
57 the levels of alcohol consumption associated with different types of drinking occasions, the population  
58 groups that participate in those occasions, and the occasion characteristics that are associated with  
59 heavy drinking and harmful outcomes [1-7]. The findings offer a distinct perspective on alcohol  
60 consumption to inform public debate, engage stakeholders and guide prevention strategies [8]. In  
61 particular, they shift attention away from the characteristics of individual drinkers and instead focus  
62 on the wider social, commercial and environmental forces that shape alcohol consumption.

63 However, few event-level studies use nationally representative data [1]. This reflects the resource-  
64 intensive nature of event-level designs, such as diary studies, ecological momentary assessment and  
65 street intercept surveys, which often impose considerable burdens on researchers or their subjects  
66 [9-12]. Event-level studies often rely instead on small or unrepresentative samples that are  
67 temporally- or spatially-concentrated. There are, however, some exceptions. Paradis et al. used  
68 occasion-level data from a nationally representative Canadian telephone survey to show that reduced  
69 heavy drinking in parenthood may arise from fewer opportunities to drink in high consumption  
70 contexts, rather than lower consumption per occasion [13, 14]. Finnish researchers used a latent class  
71 analysis (LCA) of survey data on participants' most recent drinking occasions to develop an occasion  
72 typology [5, 6]. They found that 40% of all reported alcohol consumption was within the 54% of  
73 occasions characterised as *At home with family* or *Home alone*, while *Big party nights* accounted for  
74 11% of all drinking occasions but 30% of heavy drinking occasions. We conducted a similar typological  
75 analysis for Great Britain using one-week diary data and identified eight predominant occasion types,  
76 including *Drinking at home alone* (13.4% of occasions), *Drinking at home with family* (12.8% of  
77 occasions) and *Sociable get-togethers at someone's house* (14.4% of occasions) [4]. Stevely et al. used  
78 the same diary data for 2018 to show that accounting for the common ways in which characteristics  
79 of occasions combine explains more variance in alcohol consumption than treating each characteristic  
80 as an independent variable [15].

81 Given the sparse literature in this area, further development and updating of such studies is important  
82 to provide basic epidemiological surveillance of event-level alcohol consumption. This paper therefore  
83 updates and extends our previous typology of British drinking occasions in 2009 to 2011 to address  
84 four key limitations [4]. First, it uses data from 2019 since there have been marked shifts in British  
85 drinking since 2011 [16-18]. Second, our previous analysis estimated a single latent class model that  
86 included all off-trade (e.g. home), on-trade (e.g. pub, restaurant or nightclub) and mixed-trade (e.g.  
87 home and pub) occasions. This limited the model's ability to differentiate occasion types within each  
88 trade sector and meant we only identified one mixed-trade and two on-trade occasion types. As  
89 additional on-trade occasion types are readily identifiable within public discourse (e.g. big nights out,  
90 Sunday pub lunches, dinner dates), we now estimate separate models for each trade sector to better  
91 capture the diversity of drinking within these trade sectors. Third, our 2019 dataset includes  
92 information on additional occasion characteristics (e.g. food consumption and accompanying  
93 activities such as watching TV) that permit better differentiation of occasions within the latent class  
94 model. Fourth, we undertake secondary analyses of the LCA results to deepen understanding of the  
95 occasion types associated with greater levels of alcohol-related harm.

96 Specifically, this paper aims to estimate a new typology of the predominant drinking occasions  
97 observed in Great Britain during 2019 using an expanded dataset and improved modelling procedure.  
98 It then aims to estimate the average consumption level and prevalence of heavy drinking associated

99 with each occasion type and the proportion of total reported alcohol consumption and heavy drinking  
100 occasions within each occasion type.

## 101 **METHODS**

### 102 ***Data***

103 The data come from Alcovision, a continuous, cross-sectional, online study that surveys approximately  
104 30,000 adults (18+) resident in Great Britain each year. The data are collected for market research  
105 purposes by Kantar, who draw quota samples each week based on age, gender, socioeconomic status  
106 and geographic region from their online managed access panels. Invitations to participate are timed  
107 to ensure that fieldwork includes every day of the year. Alcovision oversamples residents of Scotland  
108 and 18-34 year-olds to allow detailed analyses of these smaller populations. Kantar then construct  
109 sampling weights based on age-gender groups, social class and geographic region using UK census  
110 data. We have updated these weights using a bespoke raking technique [19].

111 Alcovision's main component is a one-week, retrospective drinking diary in which participants report  
112 the characteristics of up to two on-trade and two-off-trade drinking occasions per day. This study uses  
113 a complete case analysis of the 2019 Alcovision data, which includes 43,089 drinking occasions  
114 reported by 17,821 individuals who consumed alcohol in the diary week.

### 115 ***Measures***

#### 116 *Occasion trade sector*

117 Kantar define an occasion as a significant time-period (e.g. lunchtime, late evening) within either the  
118 on-trade or off-trade. However, as familiar occasions such as 'pre-drinking before a night out' span  
119 both trade sectors, we use an alternative definition to better characterize an occasion. Using the  
120 reported start-time and duration of each occasion in Alcovision, we specify an occasion as a period of  
121 alcohol consumption with no more than two hours between drinks [5]. This allows us to separate  
122 occasions into three categories: off-trade only, on-trade only and mixed-trade (i.e. occasions involving  
123 both trade sectors).

#### 124 *Occasion characteristics*

125 Participants record detailed information about each drinking occasion in a series of categorical  
126 variables that are summarised below and described fully in the appendix Table A1. We have previously  
127 argued that these variables capture key concepts that are important to a social practice perspective  
128 on alcohol consumption [4].

129 Two measures capture the people present: the *sex composition of the participants* (e.g. male alone,  
130 female pair) and who any *companions* were (e.g. family, friends). Four measures capture on-trade  
131 locations: the *venue* (e.g. own home, modern bar), the *venue location* (e.g. village or rural, city centre),  
132 the *reasons for choosing the venue* (e.g. friendly atmosphere, cheap) and a dichotomous variable for  
133 visiting *multiple on-trade venues*. Two measures capture the nature of the occasion: the *purpose* (e.g.  
134 quiet night in, going clubbing) and the *motivation* for the occasion (e.g. to wind down, to have a laugh).  
135 Two measures capture activities accompanying drinking: *general activities* (e.g. watching TV, doing a  
136 pub quiz) and *food eaten* (no food, a snack, a meal). Four measures capture the occasion temporalities:  
137 the *duration* (e.g. <1 hour, 4-7 hours), the *start-time* (e.g. lunchtime, night-time), the *day of the week*  
138 (Monday to 17:00 on Friday, 17:00 on Friday to 23:59 on Saturday, Sunday) and the *sequencing* of off-  
139 trade and on-trade drinking in mixed-trade occasions (e.g. pre-loading [off then on], post-loading [on  
140 then off]). Two measures capture alcohol consumption: *volume consumed* based on units (1 UK unit =

141 8g ethanol; e.g. 0.0-2.0 units, 5.0-12.0 units) and the *predominant beverage type*, which the  
142 respondent reports consuming most servings of (e.g. beer, wine).

### 143 *Summary consumption measures*

144 The summary measures describe the mean and standard deviation of units consumed in each occasion  
145 type, and the percentage of all units, off-trade units, on-trade units and units of each beverage type  
146 observed in the dataset that are consumed in each occasion type. We also calculate the percentage  
147 of all occasions within each type that involve heavy drinking and the percentage of all observed heavy  
148 drinking occasions that are within each type. Heavy drinking occasions are identified using the  
149 standard UK definition of >6 units (48g) for women and >8 units (64g) for men.

### 150 **Analysis**

151 The analysis has four stages. First, a description of the dataset using summary statistics. Second,  
152 estimation of the LCA model. Third, assignment of observed occasions to latent classes (i.e. occasion  
153 types). Fourth, calculation of the summary consumption measures for the observed occasions in each  
154 class. The first and fourth stages are descriptive analyses, so we focus on the second and third stages  
155 below.

156 We estimated separate LCA models for off-trade only, on-trade only and mixed-trade occasions. LCA  
157 assumes that the cases in a dataset can be separated into different classes (i.e. drinking occasion  
158 types) that are ‘latent’ as they cannot be observed directly. It uses variables describing each case (i.e.  
159 drinking occasion characteristics) to infer which cases may belong to each class together with a model  
160 that estimates the probability each case belongs to each class. The model uses appropriate parametric  
161 specifications for each occasion characteristic variable; specifically probit models for binary variables,  
162 ordered probit models for ordinal variables, and multinomial logit models for nominal variables. The  
163 probability of class membership is modelled using a multinomial logit model. The analyst iteratively  
164 determines the number of classes the LCA model should identify by assessing the impact of additional  
165 classes on model fit and interpretability. We used the Bayesian Information Criterion (BIC), Sample-  
166 Size Adjusted BIC, Akaike’s Information Criterion, and model entropy as standard goodness of fit  
167 measures, and also used the Vuong-Lo-Mendell-Rubin likelihood ratio test (LRT), the Lo-Mendell-  
168 Rubin adjusted LRT and the parametric bootstrapped LRT to test whether each additional class  
169 improved model fit. These tests require careful interpretation as they are sensitive to the sample size  
170 and number of model parameters, both of which are large in Alcovision [20]. This meant we  
171 particularly relied on qualitative assessments of interpretability using the research team’s topic  
172 expertise and in consultation with our project’s expert advisory group. After estimating the final  
173 occasion typology, we deterministically assigned each occasion to a latent class based on predicted  
174 posterior probabilities.

175 All models used weighted data and also included clustered standard errors to account for the nesting  
176 of occasions within individuals. The LCA models were estimated via maximum likelihood using Mplus  
177 v8.3.0.1. The analyses were not pre-registered and should be considered exploratory.

178

## 179 **RESULTS**

### 180 *Descriptive analysis*

181 Table 1 provides summary statistics for selected variables (see Appendix 2, Table A2.1 for all variables).  
182 Approximately two-thirds (68.9%) of drinking occasions in Great Britain in 2019 were off-trade only,  
183 20.8% were on-trade only and 10.3% were mixed-trade. The mean number of units consumed was  
184 lowest in off-trade only occasions at 7.2 units, compared to 8.1 units in on-trade only occasions and  
185 14.9 units in mixed-trade occasions. Off-trade only occasions were also less likely to involve heavy  
186 drinking than on-trade only or mixed-trade occasions. However, off-trade only occasions still  
187 accounted for 58.2% of all alcohol consumed and 59.7% of heavy drinking occasions. In contrast,  
188 mixed-trade occasions accounted for 20.4% of all alcohol consumption, 76.6% involved heavy drinking  
189 and these accounted for 19.3% of all heavy drinking occasions.

190 [Table 1 about here]

### 191 *Latent class analyses*

192 We estimated models with between two and eight latent classes for each trade sector (see Appendix  
193 1, Figures A1.1-A1.3 and Table A1.1 for model fit statistics). The off-trade only model showed  
194 decreasing improvements in most fit statistics (e.g. AIC, BIC, adjust-BIC) and limited interpretability  
195 beyond four classes. The on-trade only model showed continued improvements in model fit and  
196 interpretability up to eight classes, but did not converge when identifying further classes due to low  
197 frequencies in some of the observed variables. The mixed-trade models showed limited  
198 interpretability beyond three classes and no improvements in model fit beyond four or five classes  
199 using the Vuong-Lo-Mendell-Rubin LRT and Lo-Mendell-Rubin adjusted LRT. We therefore selected  
200 final models with four latent classes for off-trade only occasions, eight latent classes for on-trade only  
201 occasions, and three latent classes for mixed-trade occasions. The entropy value was above 0.8 for all  
202 classes. We reran the alcohol consumption analyses excluding the 9.5% of occasions with a class  
203 membership probability below 0.8 but this did not substantively affect our results, so we include all  
204 occasions in the results below.

205 Figure 1 reports selected characteristics for each class (see Appendix 2, Table A2.2 for full results). The  
206 descriptions in Figure 1 and below do not discuss alcohol consumption levels as the final section of  
207 the analysis addresses this and we encourage readers to focus first on the wider characteristics of  
208 each occasion type. For clarity, we refer to latent classes as occasion types henceforth.

209 [Figure 1 about here]

210 Three of the four off-trade only occasion types involve drinking with other household members and  
211 jointly account for 76.1% of off-trade only occasions. We labelled these: *Quiet drink at home alone*,  
212 *Family time at home*, and *Evening at home with partner*. These are quiet, regular occasions  
213 accompanied by low-key activities, such as eating a meal or watching TV. They are typically short, in  
214 the evening and occur throughout the week, but particularly at weekends. The remaining off-trade  
215 only occasion type is *Off-trade get together*. It involves larger groups of friends and family, an  
216 emphasis on sociability, and playing games or other leisure activities. These occasions are often longer,  
217 more likely to start earlier in the day and more concentrated on weekends.

218 The on-trade only occasion types are more diverse and can be grouped into pub-drinking occasions,  
219 longer occasions, and meals or dates. The three pub-drinking occasions jointly account for 44.7% of  
220 on-trade only occasions. We labelled them: *Meeting friends at the pub*, *Male friends at the pub* and  
221 *Quiet drink at the pub*. They involve beer-drinking in traditional pubs or similarly convenient, local or  
222 regular venues and are unlikely to involve a meal or other accompanying activities. The *Quiet drink at*

223 *the pub* type is lower-key than the other two occasion types, more often involves males alone, is  
224 shorter, and more likely to occur earlier in the day.

225 The two longer occasions often involve multiple venues. These jointly account for 20.5% of on-trade  
226 only occasions and we labelled them: *Big night out* and *Extended occasion (on-trade)*. *Big nights out*  
227 typically involve groups of friends having an upbeat outing in lively bars or clubs with music or dancing  
228 in city centres on a weekend evening. Spirits are often the dominant beverage. *Extended occasions*  
229 (*on-trade*) share these characteristics but are more heterogeneous. They additionally involve edge of  
230 town retail or entertainment complexes, take place on weekdays, start earlier in the day, and often  
231 involve a meal and activities such as dancing, karaoke or barroom games. They are also more likely to  
232 involve family members and children.

233 The remaining three on-trade only occasion types are *Family meal*, *Meal with friends* and *Date with*  
234 *partner* and account for 34.8% of on-trade only occasions. *Family meals* typically involve family,  
235 partners and children in food-serving venues at lunchtime, afternoon or evening on all days, with wine  
236 more commonly the dominant beverage than in the occasion types above. *Meals with friends* share  
237 many of these characteristics, excepting friends being present, a greater emphasis on socialising and  
238 a lower likelihood of taking place on Sundays. *Going out with partner* occasions are also similar but  
239 are more likely to involve mixed sex pairs, spending time together and a wider range of venues,  
240 although food-serving venues and meals remain common.

241 The three mixed-trade occasion types are distinct from each other and often include significant  
242 diversity within each type. *Big nights out with pre-drinking* share the characteristics of their on-trade  
243 only equivalent, but start earlier in the day and often involve pre-drinking at someone's home while  
244 getting ready and participating in games and other leisure or online activities. Bars and nightclubs in  
245 city centres remain common venues but these mixed-trade nights out are more likely to involve  
246 traditional pubs and less likely to involve dancing and live music, or eating a meal or snack. *Quiet drinks*  
247 *at home and with friends in the local* are generally, but not exclusively, low-key occasions that involve  
248 socialising but also spending quality time with family or alone at home and in traditional pubs that are  
249 convenient, local or friendly. Finally, *Extended occasions (mixed-trade)*, like their on-trade  
250 counterpart, appear fluid and heterogeneous, variously involve groups of friends, family and sometimes  
251 children, having an upbeat occasion across a range of venues and over longer time periods starting at  
252 any time of day.

### 253 *Analysis of alcohol consumption*

254 Table 2 presents descriptive statistics on the alcohol consumption associated with each occasion type  
255 (see Appendix 2, Table A2.3 for units by beverage type). The mean units consumed by respondents  
256 varies across occasion types from 4.4 units in *Family meals* to 17.7 units in *Big nights out with pre-*  
257 *drinking*. It is markedly higher in *Off-trade get togethers* (10.4 units) compared to other off-trade only  
258 occasions (5.9-6.9 units). It is also higher in *Mixed-trade extended occasions* (15.9 units), *Big nights*  
259 *out* (11.1 units) and *Male friends at the pub* (10.2 units) occasions compared to other on-trade only  
260 occasions (4.4-7.4 units). Mean consumption is over 12 units in all mixed-trade occasion types.

261 [Table 2 about here]

262 Respondents' alcohol consumption varies substantially within occasion types (see standard deviations  
263 in Table 2) and heavy drinking is common in most types. For example, in thirteen out of fifteen types,  
264 more than 25% of occasions involved the respondent drinking heavily. Conversely, respondents did  
265 not drink heavily on 41.7% of *Big night out* occasions and 16.4% of *Big night out with pre-drinking*  
266 occasions, which are stereotypically considered heavy drinking occasion types.

267 Half (50.8%) of all alcohol consumed and more than a third of heavy drinking occasions (51.8%) were  
268 in just three occasion types: *Quiet drink at home*, *Evening at home with partner* and *Off-trade get*  
269 *together* (Figure 2). The three mixed-trade types account for a further 20.4% of consumption and  
270 19.3% of heavy drinking occasions, despite comprising only 10.3% of occasions. Notably, *Big nights*  
271 *out* account for just 2.3% of total consumption and 1.9% of heavy drinking occasions, while *Big nights*  
272 *out with pre-drinking* account for just 6.0% of total consumption and 5.1% of heavy drinking occasions.

273 Finally, Figure 3 demonstrates that substantial proportions of heavy drinking occasions are in occasion  
274 types with lower mean consumption. For example, 48.7% of heavy drinking occasions are in the eight  
275 occasion types where mean consumption was less than eight units and 38.9% of heavy drinking  
276 occasions are in the three off-trade only types with mean consumption below seven units.

277 [Figures 2 and 3 about here]

278 Figure 4 and 5 present sex-specific analyses of consumption across occasions (see also Appendix 1,  
279 Tables A1.3 and A1.4). A greater proportion of women's occasions, consumption and heavy drinking  
280 occasions are in the off-trade and particularly in *Evening at home with partner* or *Off-trade get*  
281 *together* occasions. A greater proportion of men's occasions involve heavy drinking for all occasion  
282 types.

283 [Figure 4 and 5 about here]

## 284 Discussion

285 We used three latent class models to identify 15 types of drinking occasion in Great Britain. The four  
286 off-trade only occasion types were mostly low-key and only differed in minor ways from one another,  
287 except for the more lively *Off-trade get togethers*. The minor distinctions are nonetheless important  
288 as they reflect topics of public health relevance, such as drinking alone and drinking with children. The  
289 eight on-trade only types were diverse and include occasions of varying sociability in local pubs, lively  
290 days or nights out, family occasions and time spent with romantic partners. The three mixed-trade  
291 types are even more diverse and merit scrutiny because they involve high levels of alcohol  
292 consumption.

293 The findings suggest that alcohol consumption varies substantially across and within occasion types.  
294 Off-trade only occasion types account for a majority of alcohol consumption and heavy drinking  
295 occasions, but heavy drinking is common across almost all occasion types and is not concentrated  
296 within particular problematic types such as *Big nights out*. Indeed, a large proportion of heavy drinking  
297 takes place in occasion types such as *Quiet drink at home alone* and *Evening at home with partner*,  
298 which are generally commonly viewed as low-key or moderate. Conversely, people often drink  
299 moderately in occasion types usually assumed to involve heavy drinking, such as *Big nights out*. Few  
300 previous studies have examined the extent of moderate drinking within stereotypically heavy drinking  
301 occasion types, except when examining specific reasons for moderation, such as being a designated  
302 driver, a permanent abstainer or looking after intoxicated peers [21-23]. Qualitative research in  
303 particular emphasises narratives of excess within such occasions, particularly among young adults [24-  
304 27]. Our novel findings may reflect our focus on a wider age range than previous studies, or perhaps  
305 the tendency for policy debate to focus on visible public intoxication rather than unseen private  
306 intoxication.

307 Mixed-trade drinking occasions also appear important for understanding harmful alcohol  
308 consumption as at least 65% of occasions involved heavy drinking in all three mixed-trade occasion  
309 types. Event-level studies identify occasions involving drinking across the on- and off-trade trade



310 sectors as commonplace, associated with higher consumption levels and therefore higher risk [4, 15,  
311 28, 29]. However, beyond the specific practice of pre-drinking among young adults [30-32], little is  
312 known about the varying forms such occasions may take, who engages in them and how they  
313 contribute to some drinkers reaching high levels of alcohol consumption in a single day or across a  
314 week. Our findings suggest that some mixed-trade occasions are a distinct type of event (e.g. *Big*  
315 *nights out with pre-drinking*), but others are more nebulous and may reflect individuals participating  
316 in several types of bounded occasion across a day (e.g. a family meal followed by meeting friends at  
317 the pub). The latter form of mixed-trade occasion may be particularly importance for prevention  
318 research if it facilitates heavy alcohol consumption while avoiding the informal social controls that  
319 limit drinking within a single occasion.

320 A key strength of our analysis is our large, detailed and nationally-representative dataset, which  
321 increases the robustness of the LCA models and permits greater disaggregation of occasion types in  
322 each trade sector. Our analysis also examines mixed-trade occasions, which capture commonplace  
323 movements of individuals between trade sectors that are not always incorporated into event-level  
324 studies. The analysis does however have important limitations. Alcovision is a market research study  
325 designed primarily to provide timely information to commercial clients. The sampling strategy and  
326 measures therefore have important limitations that we discuss elsewhere (e.g. the use of quota  
327 sampling and unvalidated measures that do not address key public health concerns) [4, 33]. These  
328 points may limit the representativeness of our typology to the extent early responders to invitations  
329 within market research panels differ from the general population.

330 The discussion above has three key implications for policy and practice. First, prevention strategies  
331 focused primarily on stereotypically heavy drinking practices may not impact the large proportion of  
332 heavy drinking that takes place within other practices. Broader strategies are required that recognise  
333 heavy drinking occurs routinely within most drinking practices and all trade sectors. Second,  
334 promoting moderate drinking within stereotypically heavy drinking practices may still reduce harm,  
335 as heavy drinking does not appear an intrinsic element of such practices for a large proportion of  
336 drinkers. Third, prevention efforts should attend to how individuals achieve high levels of daily alcohol  
337 consumption through participation in both single drinking occasions and multiple consecutive  
338 occasions. This may suggest new intervention approaches and provide insights into the mechanisms  
339 driving success or failure of current approaches.

340 Future research should seek further evidence on who is participating in the occasion types described  
341 above, and which occasion- and individual-level characteristics are associated with lower and higher  
342 consumption levels within each type. It can also explore how individuals combine occasions across  
343 days, weeks and months to reach different levels of alcohol consumption. Using this information,  
344 researchers can also examine how to tailor interventions to the drinking occasions or target  
345 populations or individuals. Greater attention to mixed-trade drinking occasions as a general  
346 phenomenon is needed to understand the associated contexts, participants and practices.

## 347 **Conclusion**

348 Alcohol consumption levels vary substantially within and across fifteen occasion types in Great Britain.  
349 Heavy drinking is not concentrated in particular occasion types and is instead common across all types.  
350 However, moderate drinking is also common in some occasion types of that are often characterised  
351 as heavy drinking practices. Mixed-trade drinking occasions are particularly likely to involve heavy  
352 consumption and merit greater attention from researchers, policy-makers and practitioners.

## 353 References

- 354 1. Stevely A. K., Holmes J., Meier P. S. Contextual characteristics of adults' drinking occasions  
355 and their association with levels of alcohol consumption and acute alcohol-related harm: a  
356 mapping review, *Addiction* 2020: 115: 218-229.
- 357 2. Stanesby O., Labhart F., Dietze P., Wright C. J. C., Kuntsche E. The contexts of heavy drinking:  
358 A systematic review of the combinations of context-related factors associated with heavy  
359 drinking occasions, *PLoS One* 2019: 14: e0218465.
- 360 3. Stevely A. K., Holmes J., McNamara S., Meier P. S. Drinking contexts and their association  
361 with acute alcohol-related harm: A systematic review of event-level studies on adults'  
362 drinking occasions, *Drug Alcohol Rev* 2020: 39: 309-320.
- 363 4. Ally A., Lovatt M., Meier P., Brennan A., Holmes J. Developing a social practice-based  
364 typology of British drinking culture in 2009-2011: Implications for alcohol policy analysis,  
365 *Addiction* 2016: 111: 1568-1579.
- 366 5. Mustonen H., Mäkelä P., Lintonen T. Toward a typology of drinking occasions: Latent classes  
367 of an autumn week's drinking occasions, *Addiction Research and Theory* 2014: 22: 524-534.
- 368 6. Mäkelä P., Kumpulainen P., Härkönen J., Lintonen T. How Are All Drinking Occasions,  
369 Intoxication Occasions, and All Alcohol Consumed Distributed Across Different Drinking  
370 Occasion Types? A Typology of Drinking Occasions in Finland, *Journal of Studies on Alcohol*  
371 *and Drugs* 2021: 82: 767-775.
- 372 7. Dietze P. M., Livingston M., Callinan S., Room R. The big night out: What happens on the  
373 most recent heavy drinking occasion among young Victorian risky drinkers?, *Drug Alcohol*  
374 *Rev* 2014: 33: 346-353.
- 375 8. Meier P. S., Warde A., Holmes J. All drinking is not equal: how a social practice theory lens  
376 could enhance public health research on alcohol and other health behaviours, *Addiction*  
377 2017: 113: 203-213.
- 378 9. Jones A., Remmerswaal D., Verveer I., Robinson E., Franken I. H. A., Wen C. K. F., Field M.  
379 Compliance with ecological momentary assessment protocols in substance users: a meta-  
380 analysis, *Addiction* 2019: 114: 609-619.
- 381 10. Gmel R., Rehm J. Measuring Alcohol Consumption, *Contemporary Drug Problems* 2004: 31:  
382 467-540.
- 383 11. Graham K., Bernards S., Clapp J. D., Dumas T. M., Kelley-Baker T., Miller P. G., Wells S. Street  
384 intercept method: An innovative approach to recruiting young adult high-risk drinkers, *Drug*  
385 *Alcohol Rev* 2014: 33: 449-455.
- 386 12. Clapp J. D., Holmes M. R., Reed M. B., Shillington A. M., Freisthler B., Lange J. E. Measuring  
387 college students' alcohol consumption in natural drinking environments: field methodologies  
388 for bars and parties, *Evaluation review* 2007: 31: 469-489.
- 389 13. Paradis C. Parenthood, drinking locations and heavy drinking, *Soc Sci Med* 2011: 72: 1258-  
390 1265.
- 391 14. Paradis C., Demers A., Nadeau L., Picard E. Parenthood, Alcohol Intake, and Drinking  
392 Contexts: Occasio Furem Facit, *Journal of Studies on Alcohol and Drugs* 2011: 72: 259-269.
- 393 15. Stevely A. K., Holmes J., Meier P. S. Combinations of Drinking Occasion Characteristics  
394 Associated with Units of Alcohol Consumed among British Adults: An Event-Level Decision  
395 Tree Modeling Study, *Alcohol Clin Exp Res* 2021: 45: 630-637.
- 396 16. Oldham M., Holmes J. Youth Drinking in Decline Sheffield: SCHARR, University of Sheffield;  
397 2018 <https://doi.org/10.15131/shef.data.7178333> accessed 16th December 2021.
- 398 17. NHS Digital. Health Survey for England 2019. 2020 [https://digital.nhs.uk/data-and-](https://digital.nhs.uk/data-and-information/publications/statistical/health-survey-for-england/2019)  
399 [information/publications/statistical/health-survey-for-england/2019](https://digital.nhs.uk/data-and-information/publications/statistical/health-survey-for-england/2019) accessed 23rd March  
400 2021.
- 401 18. British Beer and Pub Association. Statistical Handbook 2019 London: Brewing Publications  
402 Limited; 2019.

- 403 19. Battaglia M. P., Hoaglin D. C., Frankel M. R. Practical considerations in raking survey data,  
404 Survey Practice 2009: 2: 2953.
- 405 20. Tein J.-Y., Coxe S., Cham H. Statistical power to detect the correct number of classes in latent  
406 profile analysis, Structural equation modeling: a multidisciplinary journal 2013: 20: 640-657.
- 407 21. Graber R., de Visser R., Abraham C., Memon A., Hart A., Hunt K. Staying in the 'sweet spot':  
408 A resilience-based analysis of the lived experience of low-risk drinking and abstinence among  
409 British youth, Psychol Health 2016: 31: 79-99.
- 410 22. MacLean S. Alcohol and the constitution of friendship for young adults, Sociology 2016: 50:  
411 93-108.
- 412 23. Howard D. E., Griffin M., Boekeloo B., Lake K., Bellows D. Staying Safe While Consuming  
413 Alcohol: A Qualitative Study of the Protective Strategies and Informational Needs of College  
414 Freshmen, J Am Coll Health 2007: 56: 247-254.
- 415 24. Haydock W. The consumption, production and regulation of alcohol in the UK: The relevance  
416 of the ambivalence of the carnivalesque, Sociology 2015.
- 417 25. Measham F., Brain K. 'Binge' drinking, British alcohol policy and the new culture of  
418 intoxication, Crime Media Culture 2005: 1: 262-283.
- 419 26. Griffin C., Bengry-Howell A., Hackley C., Mistral W., Szmigin I. 'Every time I do it I absolutely  
420 annihilate myself': loss of (self-)consciousness and loss of memory in young people's drinking  
421 narratives, Sociology 2009: 43: 457-476.
- 422 27. Hennell K., Piacentini M., Limmer M. 'Go hard or go home': a social practice theory approach  
423 to young people's 'risky' alcohol consumption practices, Critical Public Health 2021: 31: 66-  
424 76.
- 425 28. Miller P., Droste N., de Groot F., Palmer D., Tindall J., Busija L., Hyder S. et al. Correlates and  
426 motives of pre-drinking with intoxication and harm around licensed venues in two cities,  
427 Drug Alcohol Rev 2016: 35: 177-186.
- 428 29. Cameron M. P., Miller P. G., Roskrug M. Pre-drinking behaviour of people in the night-time  
429 economy: Evidence from a street-intercept survey in New Zealand, Drug Alcohol Rev: n/a.
- 430 30. Labhart F., Graham K., Wells S., Kuntsche E. Drinking before going to licensed premises: An  
431 event-level analysis of predrinking, alcohol consumption and adverse outcomes, Alcohol Clin  
432 Exp Res 2013: 37: 284-291.
- 433 31. Ferris J., Puljević C., Labhart F., Winstock A., Kuntsche E. The Role of Sex and Age on Pre-  
434 drinking: An Exploratory International Comparison of 27 Countries, Alcohol Alcohol 2019.
- 435 32. Østergaard J., Skov P. R. Do pre-drinkers consume more alcohol than non-pre-drinkers on an  
436 event-specific night out? A cross-national panel mobile survey of young people's drinking in  
437 England and Denmark, Drug Alcohol Rev 2014: 33: 376-384.
- 438 33. Holmes J., Angus C., Sasso A., Stevely A. K., Meier P. S. What proportion of on-trade alcohol  
439 is served to those who are already potentially intoxicated? An analysis of event-level data,  
440 Journal of Studies on Alcohol and Drugs 2021: 82: 602-609.

441

442 *Table 1: Summary statistics for occasion characteristics and alcohol consumption for drinking*  
443 *occasions in Great Britain, 2019.*

| Characteristic <sup>1</sup>      | Occasions |       | Units consumed |      |        | % of total consumption <sup>2</sup> |       |       | % that are HDO <sup>3</sup> | % of all HDO |
|----------------------------------|-----------|-------|----------------|------|--------|-------------------------------------|-------|-------|-----------------------------|--------------|
|                                  | N         | %     | Mean           | SD   | Median | Total                               | Off   | On    |                             |              |
| All                              | 43,089    | 100.0 | 8.2            | 8.4  | 5.3    | 100.0                               | 100.0 | 100.0 | 41.1                        | 100.0        |
| <b>Trade sector</b>              |           |       |                |      |        |                                     |       |       |                             |              |
| Off-trade                        | 29,678    | 68.9  | 7.2            | 7.6  | 4.2    | 58.2                                | 84.1  | -     | 35.6                        | 59.7         |
| On-trade                         | 8,956     | 20.8  | 8.1            | 8.0  | 5.4    | 21.4                                | -     | 69.5  | 41.6                        | 21.0         |
| Mixed                            | 4,455     | 10.3  | 14.9           | 10.8 | 12.0   | 20.4                                | 15.9  | 30.5  | 76.6                        | 19.3         |
| <b>Sex composition</b>           |           |       |                |      |        |                                     |       |       |                             |              |
| Mixed sex group                  | 16,630    | 37.0  | 10.6           | 10.1 | 7.0    | 52.1                                | 47.2  | 63.0  | 49.2                        | 47.9         |
| Mixed sex pair                   | 14,064    | 31.3  | 6.7            | 6.8  | 4.1    | 22.8                                | 26.2  | 15.2  | 31.9                        | 26.2         |
| Male alone                       | 5,187     | 11.6  | 7.8            | 7.8  | 9.1    | 10.6                                | 11.8  | 7.9   | 34.3                        | 10.4         |
| <b>Companions</b>                |           |       |                |      |        |                                     |       |       |                             |              |
| Partner                          | 19,518    | 43.5  | 7.8            | 8.0  | 5.1    | 39.2                                | 42.9  | 30.9  | 37.1                        | 42.3         |
| Friends                          | 12,069    | 26.9  | 11.7           | 10.2 | 8.4    | 42.7                                | 34.8  | 60.3  | 55.4                        | 39.1         |
| Family                           | 9,024     | 20.1  | 9.2            | 9.6  | 5.6    | 23.9                                | 24.1  | 23.4  | 41.9                        | 22.1         |
| <b>Venue</b>                     |           |       |                |      |        |                                     |       |       |                             |              |
| Own home (off-trade)             | 29,513    | 65.7  | 7.7            | 8.1  | 4.7    | 59.0                                | 76.3  | 20.4  | 35.7                        | 61.7         |
| Other's home (off-trade)         | 4,506     | 10.0  | 11.8           | 10.7 | 8.0    | 16.4                                | 20.4  | 7.4   | 54.1                        | 14.3         |
| Traditional pub (on-trade)       | 5,074     | 11.3  | 11.9           | 10.0 | 9.0    | 16.9                                | 5.5   | 42.3  | 57.5                        | 17.1         |
| Modern bar (on-trade)            | 2,566     | 5.7   | 13.1           | 11.0 | 9.4    | 10.6                                | 3.5   | 26.4  | 60.1                        | 9.0          |
| Multiple venues (on-trade)       | 2,182     | 4.9   | 17.5           | 11.8 | 6.1    | 12.5                                | 3.4   | 32.9  | 78.6                        | 10.0         |
| <b>Purpose of occasion</b>       |           |       |                |      |        |                                     |       |       |                             |              |
| Quiet drink (off-trade)          | 11,146    | 24.8  | 7.9            | 7.8  | 5.3    | 23.0                                | 30.7  | 5.9   | 37.8                        | 24.7         |
| Regular drink (off-trade)        | 11,032    | 24.6  | 7.7            | 8.0  | 4.7    | 20.6                                | 27.6  | 5.0   | 35.4                        | 22.8         |
| Other (on-trade)                 | 6,663     | 14.8  | 10.4           | 9.8  | 6.9    | 20.0                                | 7.8   | 47.3  | 55.6                        | 47.3         |
| Sociable (on-trade)              | 2,870     | 6.4   | 11.1           | 9.4  | 8.3    | 8.8                                 | 3.0   | 21.8  | 49.0                        | 21.8         |
| <b>Food eaten</b>                |           |       |                |      |        |                                     |       |       |                             |              |
| None                             | 17,806    | 39.7  | 7.3            | 7.3  | 4.5    | 34.4                                | 29.6  | 45.2  | 33.8                        | 35.2         |
| Snack                            | 6,880     | 15.3  | 8.7            | 8.8  | 5.5    | 16.9                                | 18.3  | 13.8  | 41.1                        | 16.6         |
| Meal                             | 20,207    | 45.0  | 8.8            | 9.1  | 5.5    | 48.7                                | 52.1  | 41.0  | 40.8                        | 48.3         |
| <b>Duration</b>                  |           |       |                |      |        |                                     |       |       |                             |              |
| Less than 1 hour                 | 11,641    | 25.9  | 3.4            | 3.9  | 2.3    | 9.7                                 | 11.6  | 5.5   | 8.2                         | 5.6          |
| 1-4 hours                        | 26,888    | 59.9  | 8.3            | 7.6  | 5.8    | 59.6                                | 59.9  | 59.0  | 41.7                        | 65.7         |
| 4-7 hours                        | 5,418     | 12.1  | 15.8           | 10.6 | 13.7   | 24.9                                | 23.1  | 29.0  | 77.0                        | 24.4         |
| <b>Start-time</b>                |           |       |                |      |        |                                     |       |       |                             |              |
| Evening                          | 26,922    | 60.0  | 7.9            | 7.9  | 5.3    | 56.8                                | 60.2  | 49.1  | 38.0                        | 59.9         |
| Afternoon                        | 9,360     | 20.8  | 9.6            | 9.6  | 5.8    | 24.6                                | 23.3  | 27.5  | 43.6                        | 23.9         |
| Lunchtime                        | 3,718     | 8.3   | 8.1            | 9.1  | 4.5    | 7.9                                 | 6.5   | 11.0  | 34.2                        | 7.4          |
| <b>Day of week</b>               |           |       |                |      |        |                                     |       |       |                             |              |
| Mon – Fri (17:00)                | 17,175    | 38.3  | 7.4            | 7.9  | 4.4    | 34.8                                | 34.6  | 35.3  | 33.2                        | 33.3         |
| Fri (17:00) – Sat                | 20,744    | 46.2  | 8.9            | 8.7  | 5.7    | 50.5                                | 50.1  | 51.2  | 42.5                        | 51.6         |
| Sunday                           | 6,974     | 15.5  | 8.0            | 8.4  | 5.0    | 14.7                                | 15.2  | 13.4  | 37.0                        | 15.1         |
| <b>Units of alcohol consumed</b> |           |       |                |      |        |                                     |       |       |                             |              |
| 0.0 – 2.0                        | 7,554     | 16.8  | 1.4            | 0.4  | 1.4    | 2.5                                 | 2.9   | 1.6   | 0.0                         | 0.0          |
| 2.0 – 3.5                        | 8,249     | 18.4  | 2.5            | 0.4  | 2.7    | 5.1                                 | 5.4   | 4.5   | 0.0                         | 0.0          |
| 3.5 – 5.0                        | 6,204     | 13.8  | 4.1            | 0.4  | 4.0    | 6.1                                 | 6.3   | 5.5   | 0.0                         | 0.0          |
| 5.0 – 12.0                       | 13,745    | 30.6  | 8.0            | 2.0  | 7.9    | 28.1                                | 28.8  | 26.5  | 57.9                        | 46.5         |
| 12.0 – 20.0                      | 5,069     | 11.3  | 15.6           | 2.3  | 15.3   | 22.0                                | 21.3  | 23.4  | 100.0                       | 29.7         |
| > 20.0                           | 4,071     | 9.1   | 29.7           | 7.1  | 28.3   | 36.3                                | 35.2  | 38.5  | 100.0                       | 23.8         |
| <b>Predominant beverage</b>      |           |       |                |      |        |                                     |       |       |                             |              |
| Beer                             | 15,702    | 35.0  | 8.0            | 7.9  | 43.1   | 33.1                                | 28.7  | 43.1  | 37.0                        | 34.0         |
| Wine                             | 12,976    | 28.9  | 7.9            | 7.6  | 14.5   | 24.4                                | 28.8  | 14.5  | 40.2                        | 30.5         |
| Spirits                          | 10,584    | 23.6  | 9.2            | 10.0 | 28.2   | 29.6                                | 30.3  | 28.2  | 39.9                        | 24.7         |

<sup>1</sup>Selected variables and highest prevalence categories within each variable only. See Appendix Table A2.1 for full data. Categories labelled off-trade or on-trade relate to those trade sectors only. <sup>2</sup>Percentage of overall consumption in trade sector occurring in occasions with this characteristic. Occasions with off-trade characteristics account for a proportion of on-trade consumption (and vice versa) if they are mixed-trade occasions. <sup>3</sup>HDO: Heavy drinking occasions.

Table 2: Levels and distribution of alcohol consumption and heavy drinking occasions across occasion types (latent classes).

| Trade sector           | Occasion type                           | % of occasions |                 |       | Units consumed in occasion |        |           |        |        |          |        |        |       | % of total consumption |          |                        | Heavy drinking occasions (HDOs) |  |
|------------------------|-----------------------------------------|----------------|-----------------|-------|----------------------------|--------|-----------|--------|--------|----------|--------|--------|-------|------------------------|----------|------------------------|---------------------------------|--|
|                        |                                         | All            | In trade sector | Total |                            |        | Off-trade |        |        | On-trade |        |        | Total | Off-trade              | On-trade | % of type <sup>1</sup> | % of all HDOs                   |  |
|                        |                                         |                |                 | Mean  | SD                         | Median | Mean      | SD     | Median | Mean     | SD     | Median |       |                        |          |                        |                                 |  |
| Off-trade only         | Quiet drink at home alone               | 19.6           | 28.5            | 6.2   | (6.7)                      | 3.8    | 6.2       | (6.7)  | 3.8    | -        | -      | -      | 13.2  | 19.1                   | -        | 27.3                   | 14.1                            |  |
|                        | Family time at home                     | 9.3            | 13.5            | 6.9   | (7.0)                      | 4.2    | 6.9       | (7.0)  | 4.2    | -        | -      | -      | 7.3   | 10.6                   | -        | 32.3                   | 7.9                             |  |
|                        | Evening at home with partner            | 23.5           | 34.1            | 5.9   | (5.8)                      | 4.0    | 5.9       | (5.8)  | 4.0    | -        | -      | -      | 14.0  | 20.3                   | -        | 27.4                   | 16.9                            |  |
|                        | Off-trade get together                  | 16.5           | 23.9            | 10.4  | (10.0)                     | 6.8    | 10.4      | (10.0) | 6.8    | -        | -      | -      | 23.6  | 34.2                   | -        | 48.1                   | 20.8                            |  |
| On-trade only          | Meeting friends at the pub              | 3.8            | 18.0            | 7.4   | (6.1)                      | 5.7    | -         | -      | -      | 7.4      | (6.1)  | 5.7    | 3.3   | -                      | 10.6     | 40.4                   | 4.0                             |  |
|                        | Male friends at the pub                 | 2.7            | 12.9            | 10.2  | (6.7)                      | 9.1    | -         | -      | -      | 10.2     | (6.7)  | 9.1    | 2.9   | -                      | 9.3      | 55.7                   | 3.9                             |  |
|                        | Quiet drink at the pub                  | 2.9            | 13.8            | 5.5   | (4.6)                      | 4.1    | -         | -      | -      | 5.5      | (4.6)  | 4.1    | 1.9   | -                      | 6.0      | 23.5                   | 1.8                             |  |
|                        | Big night out                           | 1.3            | 6.1             | 11.1  | (9.1)                      | 8.5    | -         | -      | -      | 11.1     | (9.1)  | 8.5    | 2.3   | -                      | 7.5      | 58.3                   | 1.9                             |  |
|                        | Extended occasion (on-trade)            | 3.0            | 14.4            | 15.9  | (12.2)                     | 13     | -         | -      | -      | 15.9     | (12.2) | 13     | 7.0   | -                      | 22.7     | 68.9                   | 5.4                             |  |
|                        | Family meal                             | 2.3            | 11.2            | 4.4   | (4.3)                      | 2.8    | -         | -      | -      | 4.4      | (4.3)  | 2.8    | 1.2   | -                      | 3.9      | 17.0                   | 1.0                             |  |
|                        | Meal with friends                       | 2.3            | 10.8            | 5.3   | (5.3)                      | 3.8    | -         | -      | -      | 5.3      | (5.3)  | 3.8    | 1.4   | -                      | 4.6      | 24.1                   | 1.4                             |  |
| Going out with partner | 2.6                                     | 12.7           | 5.1             | (4.8) | 3.2                        | -      | -         | -      | 5.1    | (4.8)    | 3.2    | 1.5    | -     | 4.8                    | 22.5     | 1.6                    |                                 |  |
| Mixed-trade            | Big night out with pre-drinking         | 2.3            | 22.6            | 17.7  | (10.8)                     | 15.2   | 8.7       | (7.5)  | 6.4    | 9.0      | (7.2)  | 7.4    | 6.0   | 4.4                    | 9.7      | 83.6                   | 5.1                             |  |
|                        | Quiet drink at home and with friends... | 4.1            | 39.2            | 12.1  | (8.5)                      | 10.2   | 6.1       | (5.9)  | 4.1    | 6.0      | (5.2)  | 4.5    | 5.5   | 4.1                    | 8.8      | 65.2                   | 7.0                             |  |
|                        | Extended occasion (mixed trade)         | 3.9            | 38.1            | 16.2  | (12.3)                     | 13     | 9.3       | (9.2)  | 5.7    | 6.9      | (7.0)  | 4.5    | 8.8   | 7.4                    | 12.1     | 69.6                   | 7.2                             |  |

<sup>1</sup>Percentage of occasions within type that are heavy drinking occasions

Figure 1: Summary of drinking occasion typology for Great Britain, 2019 (see Appendix A2 for full results).

| Quiet drink at home alone<br>19.6% of all occasions<br>28.5% of off-trade only occasions                                                                                                                                                        | Family time at home<br>9.3% of all occasions<br>13.5% of off-trade only occasions                                                                                                                                | Evening at home with partner<br>23.5% of all occasions<br>34.1% of off-trade only occasions                                                                                                                                                 |
|-------------------------------------------------------------------------------------------------------------------------------------------------------------------------------------------------------------------------------------------------|------------------------------------------------------------------------------------------------------------------------------------------------------------------------------------------------------------------|---------------------------------------------------------------------------------------------------------------------------------------------------------------------------------------------------------------------------------------------|
| <p><b>Nearly always</b><sup>1</sup>: Own home, less than four hours.</p> <p><b>Commonly</b><sup>2</sup>: Alone, quiet or regular drink, watching TV, no food, evening, Mon-Fri, Fri-Sat.</p>                                                    | <p><b>Nearly always</b>: Mixed sex group, partner or family, own home, less than four hours.</p> <p><b>Commonly</b>: Quiet or regular drink, watching TV, meal, Fri-Sat.</p>                                     | <p><b>Nearly always</b>: Mixed sex pair, partner, own home, less than four hours.</p> <p><b>Commonly</b>: Quiet or regular drink, watching TV, meal, evening, Fri-Sat, wine.</p>                                                            |
| Off-trade get together<br>16.5% of all occasions<br>23.9% of off-trade only occasions                                                                                                                                                           | Meeting friends at the pub<br>3.8% of all occasions<br>18.0% of on-trade only occasions                                                                                                                          | Male friends at the pub<br>2.7% of all occasions<br>12.9% of on-trade only occasions                                                                                                                                                        |
| <p><b>Nearly always</b>: N/A</p> <p><b>Commonly</b>: Mixed sex group, friends, own or other's home, sociable, games or leisure activities, meal, less than four hours, evening, Fri-Sat.</p>                                                    | <p><b>Nearly always</b>: Mixed sex group.</p> <p><b>Commonly</b>: Friends, traditional pub, regular or local place, no food, less than four hours, evening, Fri-Sat, beer.</p>                                   | <p><b>Nearly always</b>: Friends, Male group or pair.</p> <p><b>Commonly</b>: Traditional pub, regular or local place, convenient location, no food, evening, 1-4 hours, Fri-Sat, beer.</p>                                                 |
| Quiet drink at the pub<br>2.9% of all occasions<br>13.8% of on-trade only occasions                                                                                                                                                             | Big night out<br>1.3% of all occasions<br>6.1% of on-trade only occasions                                                                                                                                        | Extended occasion (on-trade)<br>3.0% of all occasions<br>14.4% of on-trade only occasions                                                                                                                                                   |
| <p><b>Nearly always</b>: N/A</p> <p><b>Commonly</b>: Male alone, traditional pub, convenient place, no food, Mon-Fri, beer.</p>                                                                                                                 | <p><b>Nearly always</b>: Evening or nighttime.</p> <p><b>Commonly</b>: Mixed sex group, friends, club, city centre, clubbing or night out, having a laugh, live music, no food, 1-4 hours, Fri-Sat, spirits.</p> | <p><b>Nearly always</b>: N/A</p> <p><b>Commonly</b>: Mixed sex group, friends, child present, multiple venues, traditional pub, quality of food and drinks, games, meal, 1-4 hours, more than four hours, evening, Mon-Fri, Fri-Sat.</p>    |
| Family meal<br>2.3% of all occasions<br>11.2% of on-trade only occasions                                                                                                                                                                        | Meal with friends<br>2.3% of all occasions<br>10.8% of on-trade only occasions                                                                                                                                   | Going out with partner<br>2.6% of all occasions<br>12.7% of on-trade only occasions                                                                                                                                                         |
| <p><b>Nearly always</b>: N/A</p> <p><b>Commonly</b>: Mixed sex group, family, food pub or restaurant, quality of food or drinks, meal, lunchtime or afternoon, beer.</p>                                                                        | <p><b>Nearly always</b>: N/A</p> <p><b>Commonly</b>: Mixed sex group, friends, food pub or restaurant, quality of food or drinks, meal, 1-4 hours, Mon-Fri, Fri-Sat.</p>                                         | <p><b>Nearly always</b>: Mixed sex pair, partner, less than four hours.</p> <p><b>Commonly</b>: Food pub or restaurant, quality of food or drinks, convenient location, having time for partner, meal, no food, evening, Fri-Sat, beer.</p> |
| Big night out with pre-drinking<br>2.3% of all occasions<br>22.6% of mixed-trade occasions                                                                                                                                                      | Quiet drink at home and with friends in the local.<br>4.1% of all occasions<br>39.2% of mixed-trade occasions                                                                                                    | Extended occasion (mixed-trade)<br>3.9% of all occasions<br>38.1% of mixed-trade occasions                                                                                                                                                  |
| <p><b>Nearly always</b>: Friends, own or other's home.</p> <p><b>Commonly</b>: Mixed sex group, city centre, pre-drinking, having a laugh, games or leisure activities, no food, 1-4 hours, more than four hours, evening, Fri-Sat, off→on.</p> | <p><b>Nearly always</b>: N/A</p> <p><b>Commonly</b>: Mixed sex pair, partner, friends, own home, traditional pub, chilling out, watching TV, 1-4 hours, evening, off→on, on→off, beer.</p>                       | <p><b>Nearly always</b>: N/A</p> <p><b>Commonly</b>: Mixed sex group, family, friends, partner, child present, own home, meal, 1-4 hours, more than 4 hours, lunchtime or afternoon, evening or night-time, off→on.</p>                     |

<sup>1</sup>Nearly always: Item response probability  $\geq 0.9$ . <sup>2</sup>Commonly: Item response probability is  $\geq 0.4$  and  $< 0.9$ . Item response probability for categories are sometimes combined for interpretability. Item response probability is the probability that an occasion of this type has this characteristic. See Appendix Table A2.2 for full results. Dark cells are off-trade only occasions, mid-grey cells are on-trade only occasions, light grey cells are mixed-trade occasions

Figure 2: Distribution of drinking occasions, total alcohol consumption and heavy drinking occasions across occasion types estimated from latent class models.

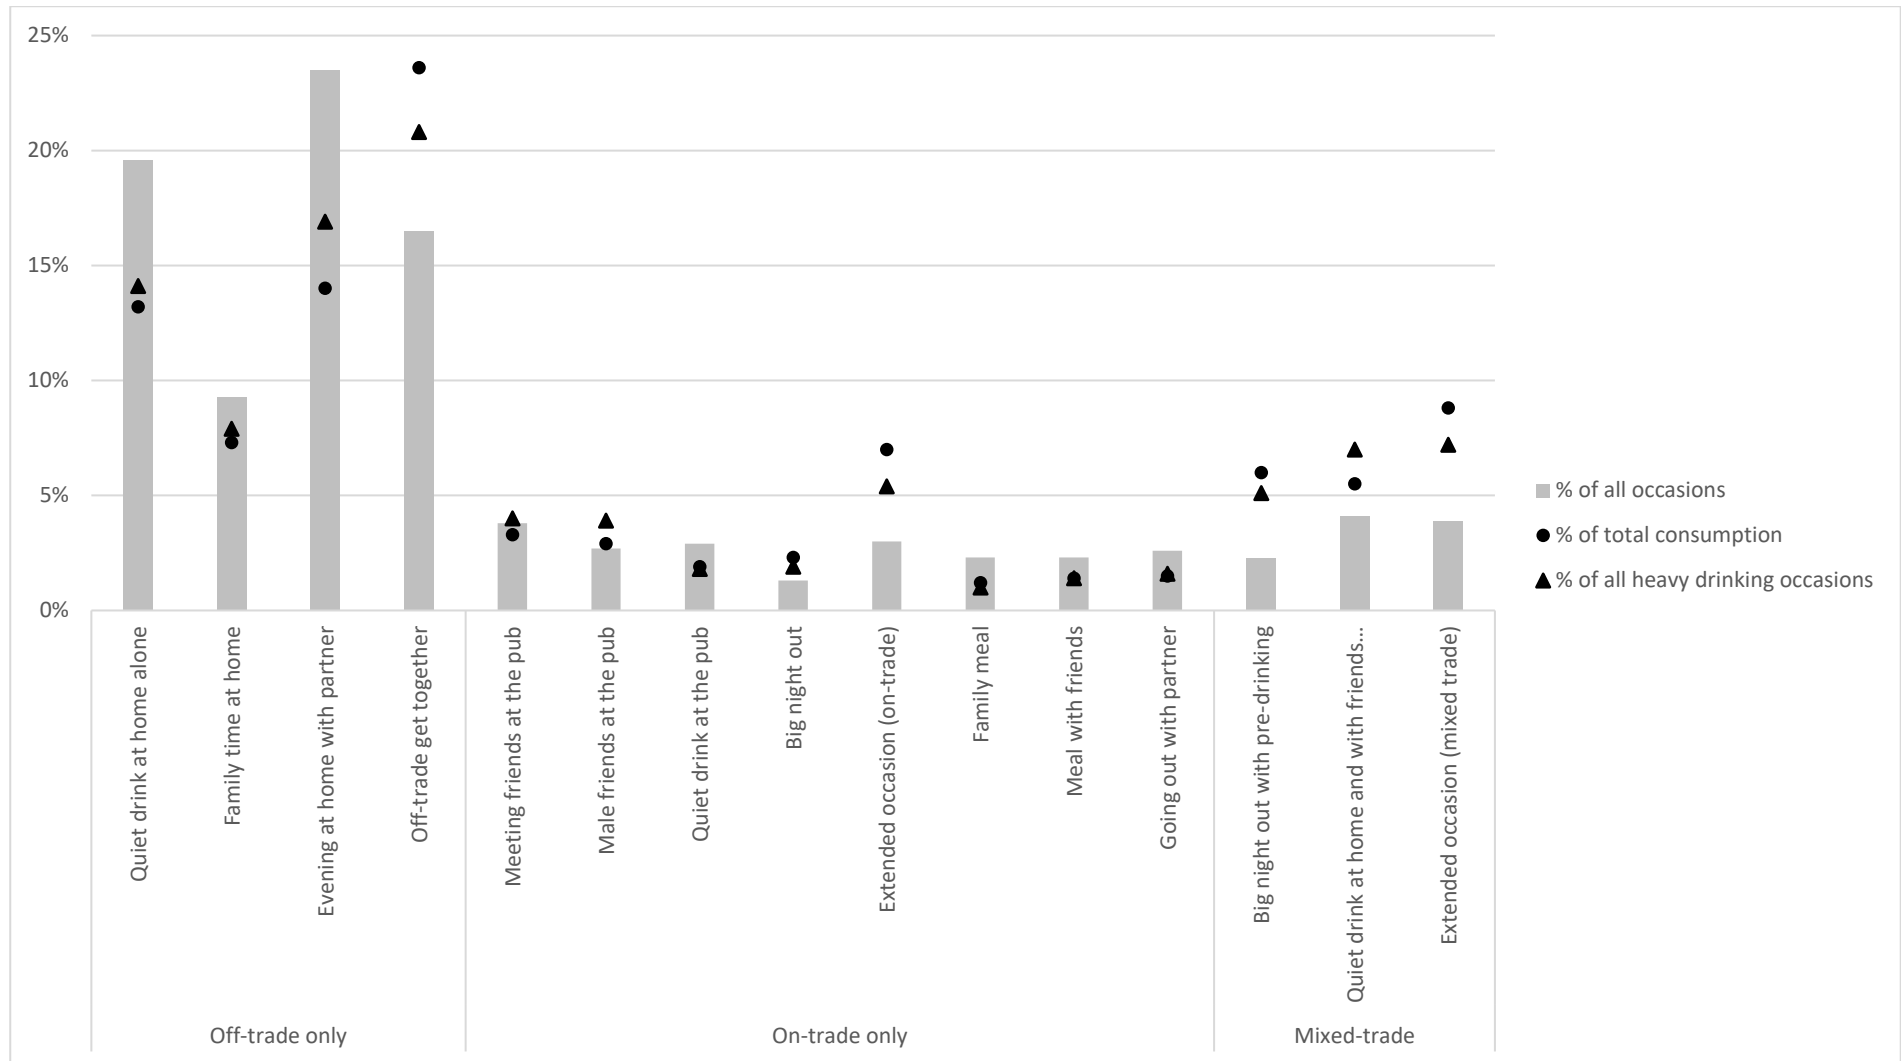

Figure 3: Mean units consumed by occasion type and proportion of occasions in type that are heavy drinking occasions estimated from latent class models.

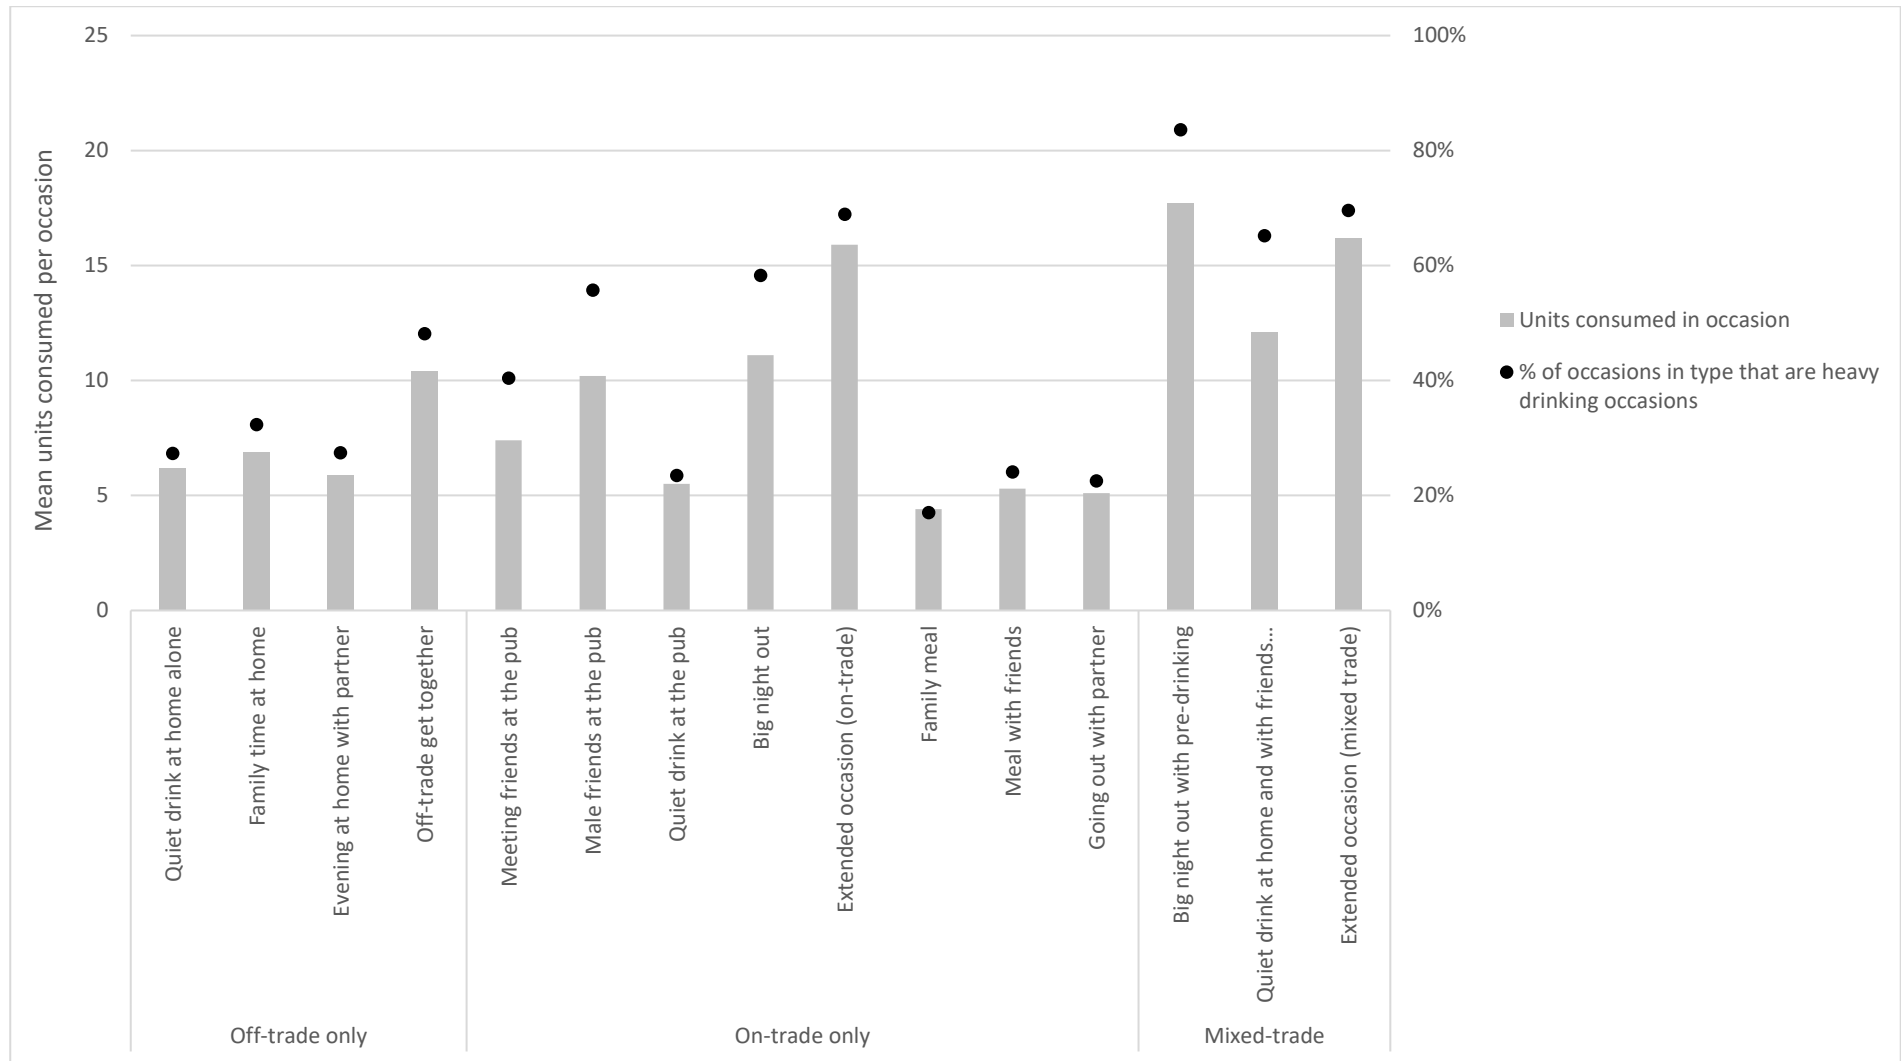



Figure 4: Distribution of drinking occasions, total alcohol consumption and heavy drinking occasions across occasion types by sex estimated from latent class models.

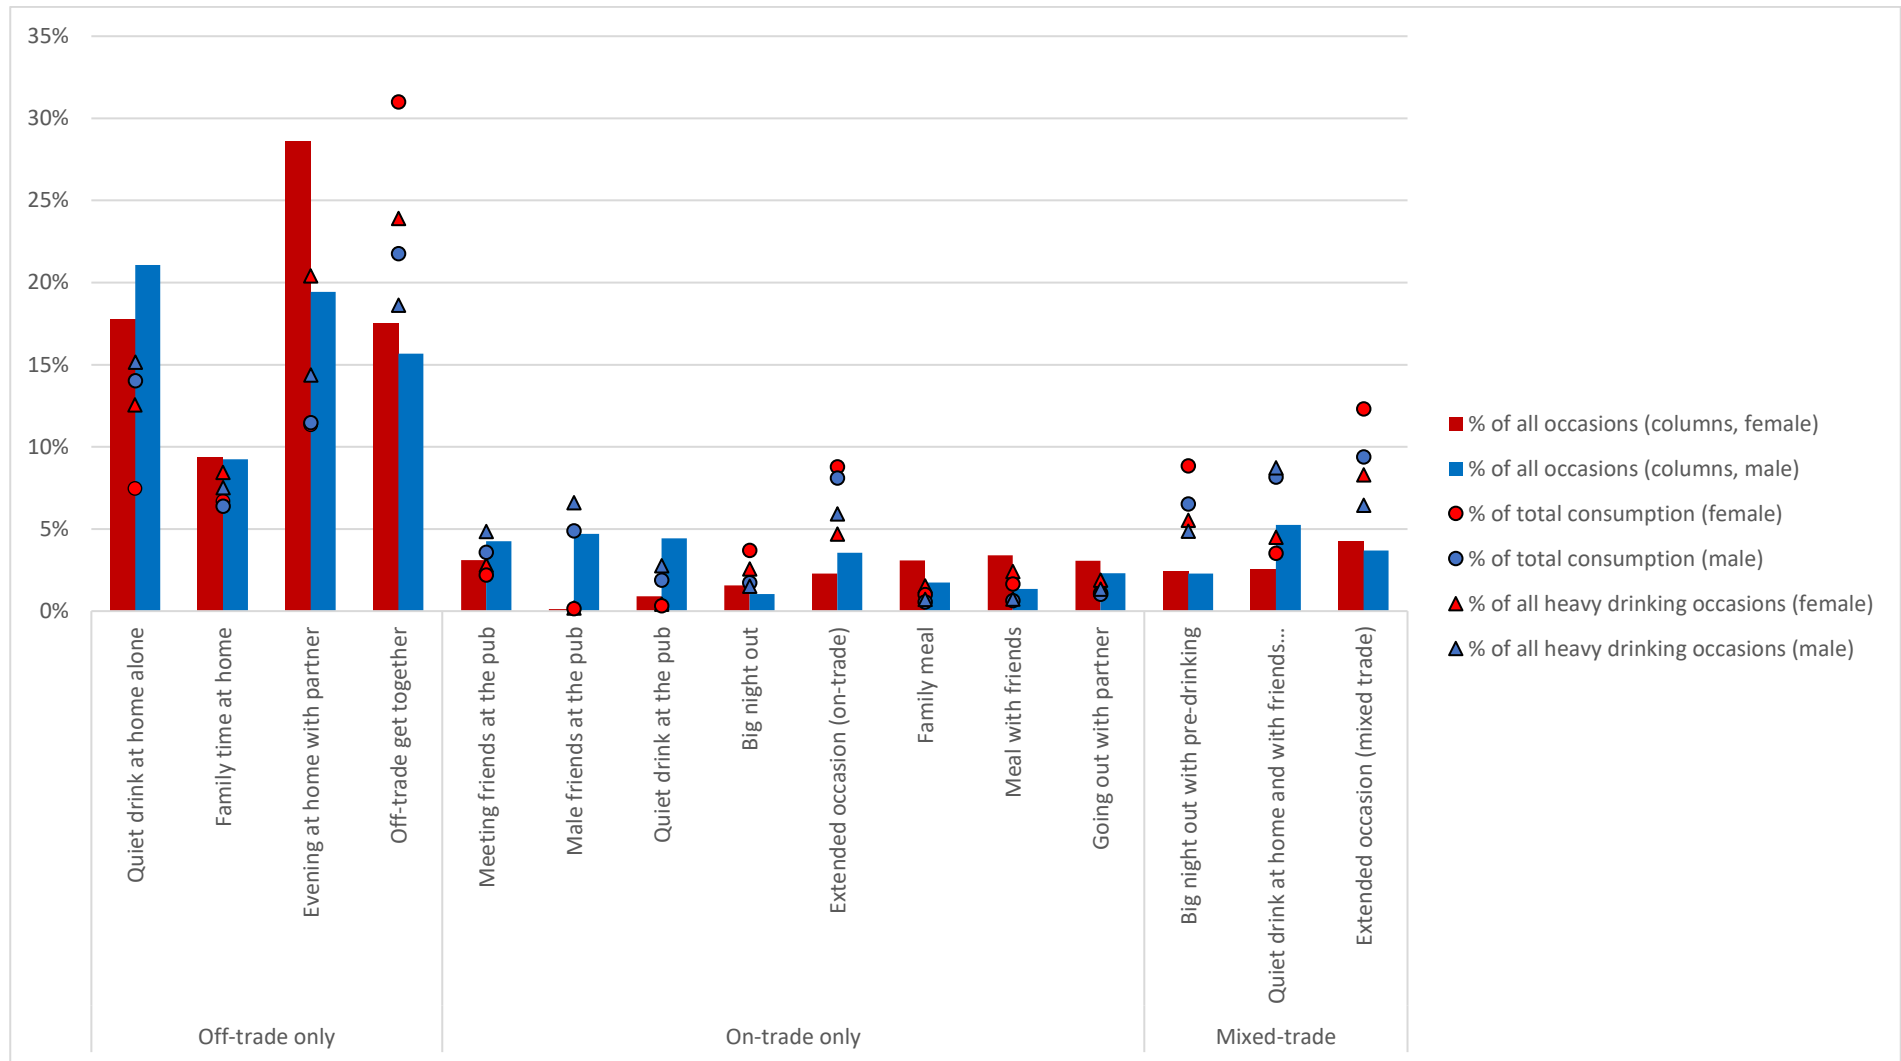

Figure 5: Mean units consumed by occasion type and proportion of occasions in type that are heavy drinking occasions by sex estimated from latent class models.

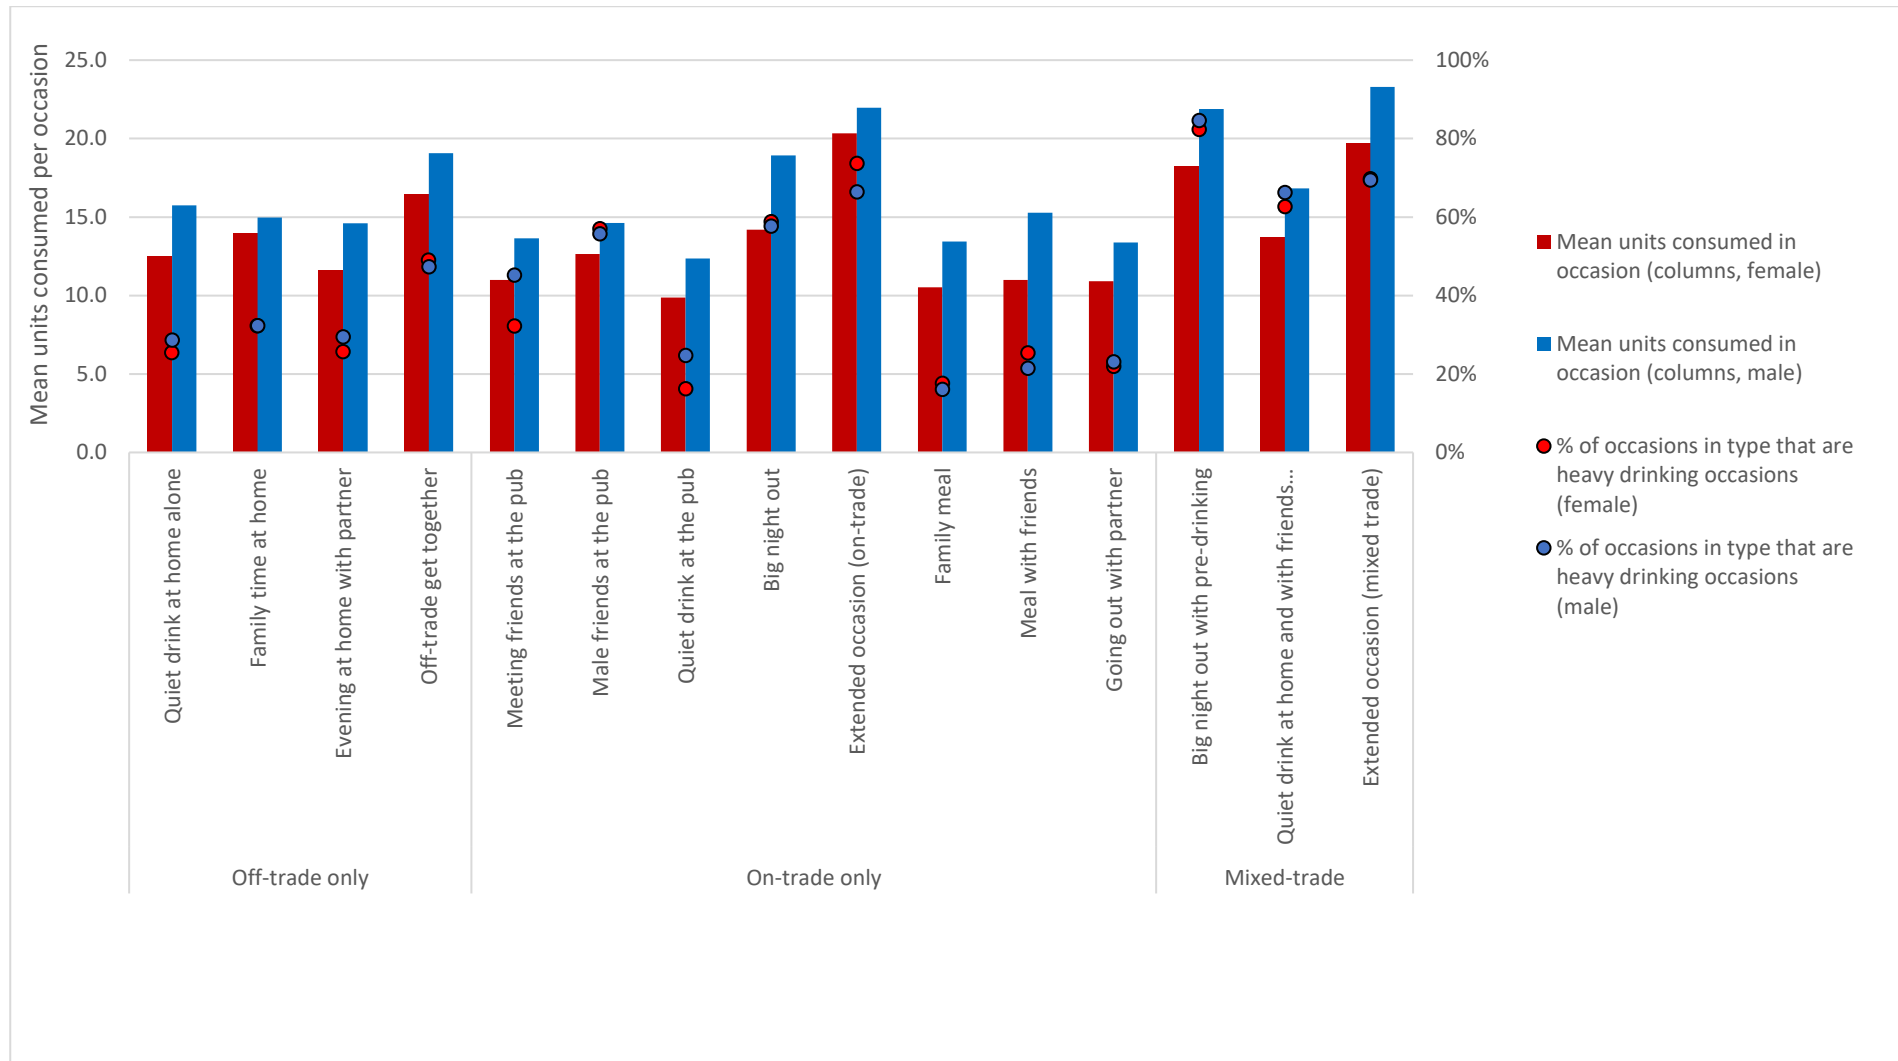

Source: https://medrxiv.org/content/10.1101/2023.08.31.23294881v1.full.pdf
